# Supplementary material for: Loss of the interleukin-6 receptor causes immunodeficiency, atopy, and abnormal inflammatory responses
Source: PubMed Central journal article supplement (PMC6719421; doi:10.1084/jem.20190344), 2019-06-24
Supplement: JEM_20190344_sm.pdf [file JEM_20190344_sm.pdf]

## Supplemental material

Spencer et al., <https://doi.org/10.1084/jem.20190344>

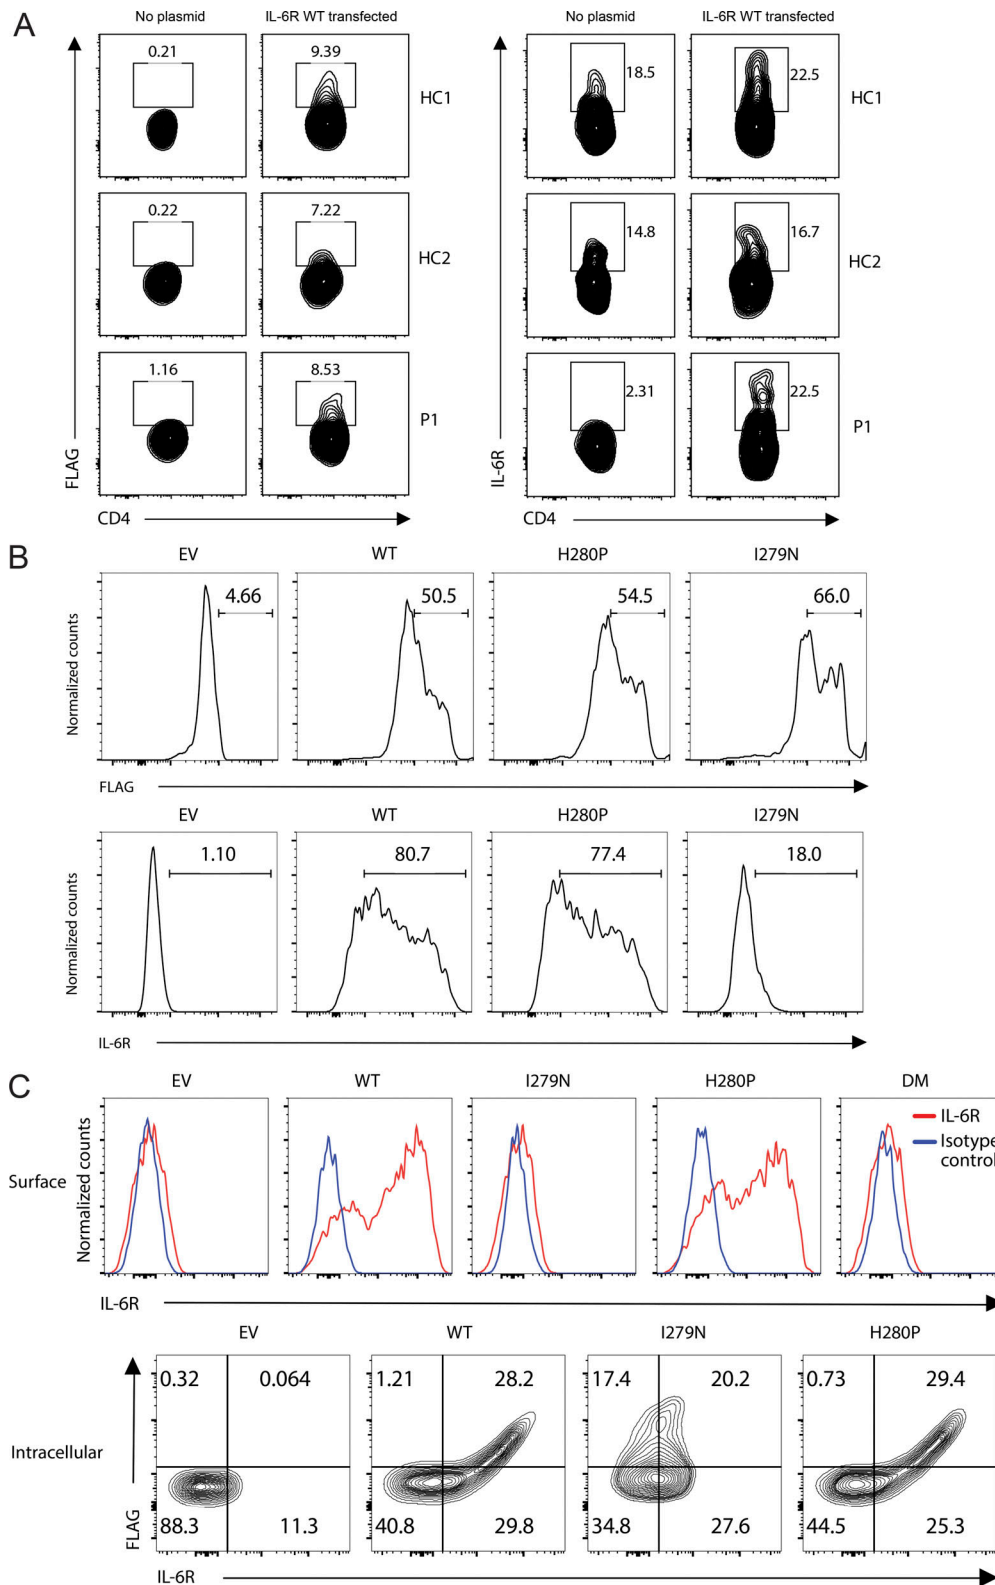

Figure S1. **Assessment of ectopic IL6R expression.** (A) PBMCs from healthy controls (HC) and P1 were isolated from Ficoll gradient and transfected with WT IL-6R cDNA cloned in the pcDNA3.1+/C-(K)-DYK plasmid using T cell nucleofection. After 24 h, the PBMCs were intracellularly stained with anti-CD4, anti-FLAG, and anti-IL-6R antibodies and analyzed by flow cytometry. (B) HEK293 cells were transfected with empty vector (EV), WT, H280P, and I279N mutants cloned in the pcDNA3.1+/C-(K)-DYK plasmid. After 24 h, the proteins and transfection efficiencies were measured by flow cytometry using anti-FLAG and IL-6R antibody (UV4). Similar results were observed when stained with the IL-6R clone M5 (not depicted). (C) Human healthy PBMCs were transfected with empty vector (EV), WT, I279N, H280P, and I279N/H280P (DM) mutants using T cell nucleofection. After 24 h, the proteins and transfection efficiencies were measured by flow cytometry using anti-FLAG and IL-6R antibody (UV4). Top: Surface staining (red, IL-6R; blue, isotype control). Bottom: Intracellular staining.

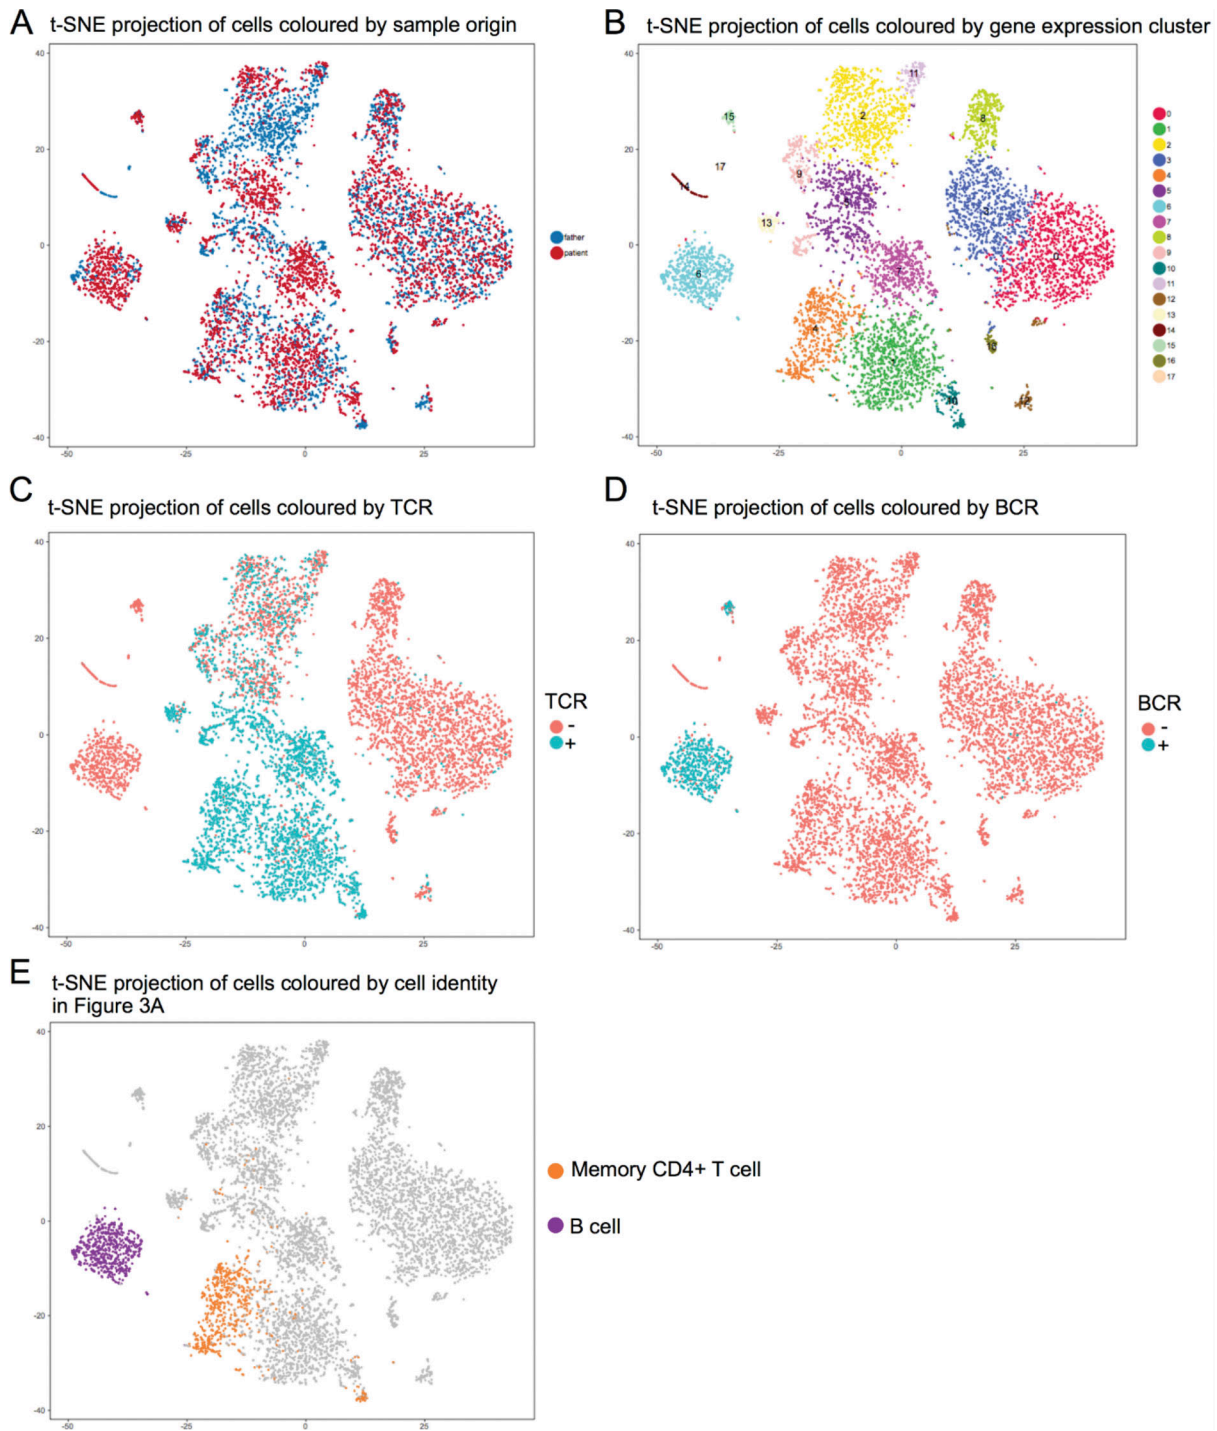

Figure S2. **tSNE projections of PBMCs from the IL-6R-null patient (P1) and her father (HP1).** (A–D) Clusters of single cells are identified using a shared-nearest-neighbor graph (Xu and Su, 2015). Each cell is assigned a cluster. The clustering groups together cells that have similar expression profiles. tSNE plots are color coded by sample (A), gene expression cluster membership (B), TCR presence (C), and B cell receptor (BCR; D). (E) Memory CD4<sup>+</sup> T and B cells were identified by gene expression or TCR or BCR presence and assigned for the differentiation analysis displayed in Fig. 3 A.

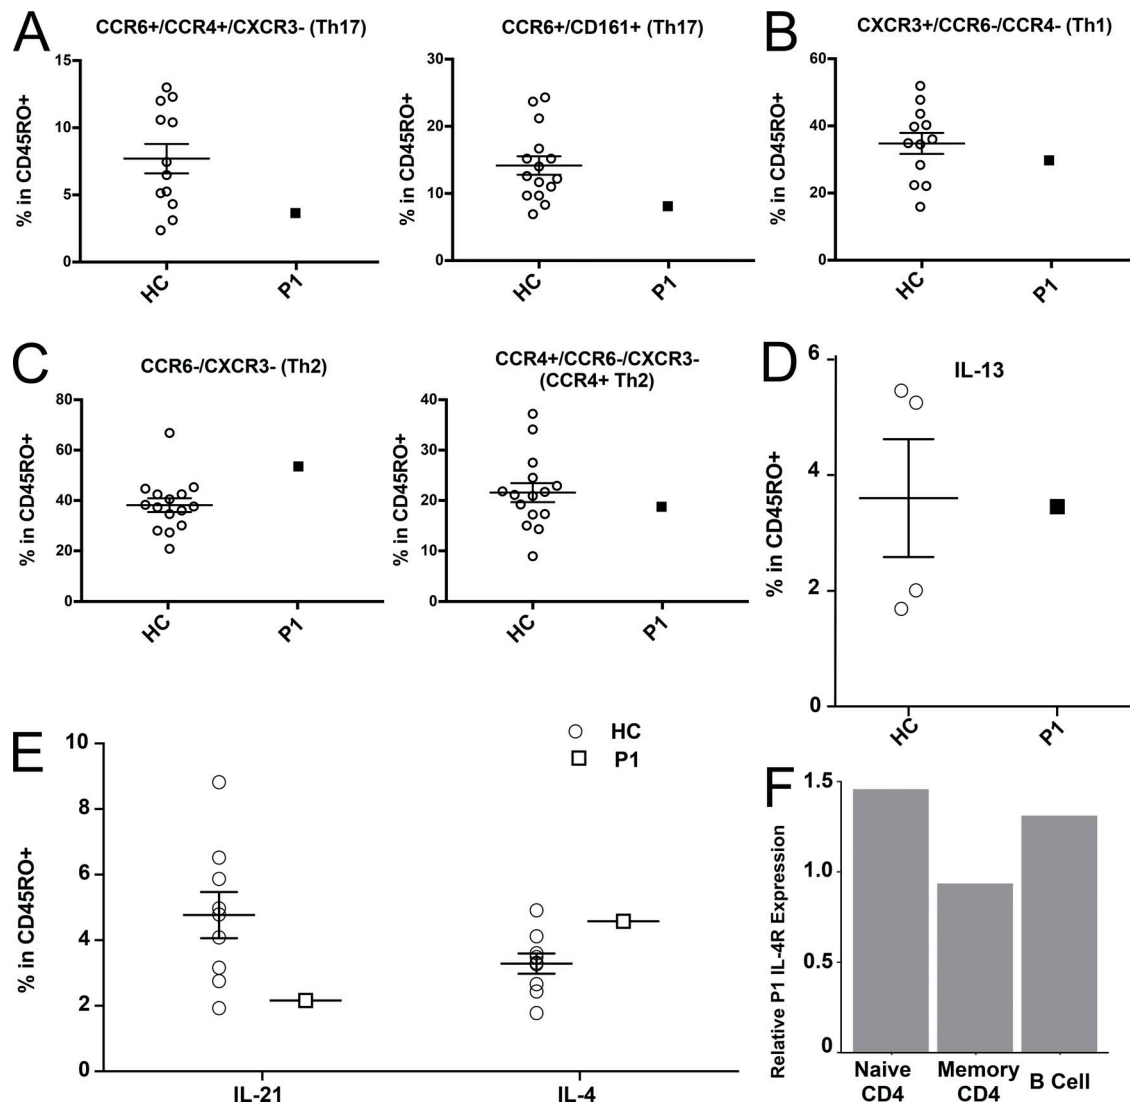

Figure S3. **Phenotype assessment of P1.** (A–C) FACS assessment of the indicated surface markers used to identify memory CD4<sup>+</sup> Th17 (A), Th1 (B), and Th2 (C) T cells. (D and E) FACS analysis of the intracellular cytokine staining of healthy control (HC) and P1 PBMCs after PMA and ionomycin stimulation for IL-21 and IL-4 (D) and IL-13 (E). (F) Relative average expression of *IL4R* in the patient with respect to the father, within naive CD4<sup>+</sup> and memory CD4<sup>+</sup> T cell and B cell populations. For each cluster, mean *IL4R* expression was calculated for patient and father cells. These values were divided to obtain the fold-change of average expression between the two samples. Error bars represent SEM.

Table S1. **Comparative analysis of clinical features of patients with *IL6R* mutations and other patient cohorts with defined gene defects presenting with elevated IgE**

|                               | <i>IL6R</i>    | <i>IL6ST</i>   | <i>STAT3</i>    | <i>ZNF341</i>   | <i>DOCK8</i>   | <i>CARD11</i>  | <i>PGM3</i>     | <i>ERBIN</i>   |
|-------------------------------|----------------|----------------|-----------------|-----------------|----------------|----------------|-----------------|----------------|
| <i>n</i>                      | 2              | 2              | 140             | 19              | 64             | 12             | 29              | 3              |
| Inheritance                   | AR             | AR             | AR              | AR              | AR             | AD             | AR              | AD             |
| IgE                           | ↑ <sup>a</sup> | ↑ <sup>a</sup> | ↑↑ <sup>a</sup> | ↑↑ <sup>a</sup> | ↑ <sup>a</sup> | ↑ <sup>a</sup> | ↑↑ <sup>a</sup> | ↑ <sup>a</sup> |
| Eosinophilia                  | +              | +              | +               | +/-             | +              | +              | +               | +              |
| Eczema                        | ++             | +              | +               | +               | ++             | ++             | +               | +              |
| Infections                    |                |                |                 |                 |                |                |                 |                |
| Abscess                       | ++             | -/+            | ++              | +               | +              | +              | ++              | -              |
| Pneumonia                     | ++             | ++             | +++             | +               | +              | ++             | ++              | ++             |
| Sinusitis/otitis              | +              | +              | +               | +               | ++             | +              | +               | +              |
| Candidiasis                   | -              | -              | ++              | ++              | +              | +              | +               | -              |
| Viral infections              | -              | -              | +               | -               | +++            | +              | ++              | -              |
| Musculoskeletal abnormalities | -              | ++             | ++              | +               | +              | +/-            | -               | -              |
| IgE hypersensitivity          | -              | +              | +               | +               | +++            | +++            | +++             | +              |
| Autoimmunity                  | -              | -              | +               | -               | ++             | +              | ++              | -              |
| CNS abnormalities             | -              | ++             | +               | +               | ++             | -              | ++              | -              |
| Neoplasia                     | -              | -              | +               | +/-             | ++             | -              | +               | -              |
| Immunological features        |                |                |                 |                 |                |                |                 |                |
| Immunoglobulins               | Normal/low     | Normal         | Normal          | Normal/high IgG | Normal/low     | Normal/low     | Normal          | Normal         |
| Lymphopenia                   | -              | -              | -               | +/-             | +/-            | -              | +               | -              |
| Th17 cells                    | Normal/low     | Normal/low     | Low             | Low             | Low            | Normal         | Normal          | Normal         |
| CD19 <sup>+</sup> B cells     | Normal         | Normal/low     | Normal/low      | Normal          | Normal/low     | Normal/low     | Normal/low      | Normal         |
| Switched-memory B cells       | Low            | Normal/low     | Low             | Low             | Low            | Normal/low     | Normal/low      | Normal         |

Recently a comprehensive table comparing phenotypes with elevated IgE was also presented in [Shahin et al., 2019](#). AD, autosomal dominant; AR, autosomal recessive; CNS, central nervous system.

<sup>a</sup>↑↑ refers to IgE levels >5,000 IU/ml; ↑ refers to IgE levels 1,000–5,000 IU/ml.

Table S2. **Filtered homozygous C1 variants identified in P1 and filtered homozygous variants in P2**

| Gene            | Gene description                                      | Coding effect | Genomic annotation (GRCh37) | cDNA annotation                  | Protein annotation                    | gnomAD AF  | CADD score |
|-----------------|-------------------------------------------------------|---------------|-----------------------------|----------------------------------|---------------------------------------|------------|------------|
| P1              |                                                       |               |                             |                                  |                                       |            |            |
| <i>MAP7D1</i>   | MAP7 domain containing 1                              | Missense      | chr1:g.36641812A>G          | ENST00000316156.4:<br>c.863A>G   | ENSP00000320228.4:<br>p.Gln288Arg     | 0.00003237 | 17.7       |
| <i>PIK3R3</i>   | Phosphoinositide-3-kinase regulatory subunit 3        | Stop gain     | chr1:g.46642005G>A          | ENST00000540385.1:<br>c.139C>T   | ENSP00000439913.1:<br>p.Arg47*        | 0.00001619 | 31.0       |
| <i>CCDC18</i>   | Coiled-coil domain containing 18                      | Stop gain     | chr1:g.93711681G>T          | ENST00000343253.7:<br>c.2998G>T  | ENSP00000343377.7:<br>p.Glu1000*      | 0.00001247 | 50.0       |
| <i>IL6R</i>     | Interleukin-6 receptor                                | Frameshift    | chr1:g.154407084del         | ENST00000368485.3:<br>c.548del   | ENSP00000357470.3:<br>p.Gly183Glnfs*7 | 0          | NA         |
| <i>NES</i>      | Nestin                                                | Missense      | chr1:g.156639266C>T         | ENST00000368223.3:<br>c.4714G>A  | ENSP00000357206.3:<br>p.Glu1572Lys    | 0          | 21.1       |
| <i>PLXNA2</i>   | Plexin A2                                             | Missense      | chr1:g.208218435G>A         | ENST00000367033.3:<br>c.3616C>T  | ENSP00000356000.3:<br>p.Leu1206Phe    | 0.00004329 | 23.6       |
| <i>KCTD3</i>    | Potassium channel tetramerization domain containing 3 | Missense      | chr1:g.215792524C>T         | ENST00000259154.4:<br>c.1777C>T  | ENSP00000259154.2:<br>p.Leu593Phe     | 0.00000813 | 24.6       |
| P2              |                                                       |               |                             |                                  |                                       |            |            |
| <i>MAB21L3</i>  | Mab21-like-3                                          | Splice donor  | chr1:g.116666979G>T         | ENST00000369500.3:<br>c.481+1G>T | ENST00000369500.3:<br>c.481+1G>T      | 0.000125   | 33.0       |
| <i>CYP26A1</i>  | Cytochrome p450                                       | Missense      | chr10:g.94836739G>A         | ENST00000224356.4:<br>c.1172G>A  | ENST00000224356.4:<br>c.1172G>A       | 0.000398   | 31.0       |
| <i>TECTA</i>    | Tectorin alpha                                        | Missense      | chr11:g.121016276C>T        | ENST00000392793.1:<br>c.3556C>T  | ENST00000392793.1:<br>c.3556C>T       | 0.000874   | 28.3       |
| <i>SLC25A24</i> | Solute carrier family 25                              | Splice donor  | chr1:g.108742577C>A         | ENST00000565488.1:<br>c.183+1G>T | ENST00000565488.1:<br>c.183+1G>T      | 0          | 28.1       |
| <i>PEAR1</i>    | Platelet endothelial aggregation receptor             | Missense      | chr1:g.156877958A>G         | ENST00000338302.3:<br>c.941A>G   | ENST00000338302.3:<br>c.941A>G        | 0.0000258  | 27.5       |
| <i>TRIM69</i>   | Tripartite motif containing protein                   | Missense      | chr15:g.45050880T>C         | ENST00000559390.1:<br>c.641T>C   | ENST00000559390.1:<br>c.641T>C        | 0.00000406 | 27.2       |
| <i>ARHGEF12</i> | Rho guanine nucleotide exchange factor 12             | Missense      | chr11:g.120328462G>A        | ENST00000397843.2:<br>c.2222G>A  | ENST00000397843.2:<br>c.2222G>A       | 0.000252   | 27.0       |
| <i>IL6R</i>     | Interleukin 6 receptor alpha                          | Missense      | chr1:g.154408473T>A         | ENST00000368485.3:<br>c.836T>A   | ENST00000368485.3:<br>c.836T>A        | 0          | 24.8       |
| <i>DIXDC1</i>   | DIX-domain containing 1                               | Missense      | chr11:g.111845662A>G        | ENST00000440460.2:<br>c.611A>G   | ENST00000440460.2:<br>c.611A>G        | 0.000399   | 24.3       |
| <i>SPTA1</i>    | Spectrin alpha                                        | Missense      | chr1:g.158585147A>G         | ENST00000368147.4:<br>c.6647T>C  | ENST00000368147.4:<br>c.6647T>C       | 0.0000122  | 23.8       |
| <i>DLG5</i>     | Discs large 5                                         | Missense      | chr10:g.79577595C>T         | ENST00000372391.2:<br>c.3724G>A  | ENST00000372391.2:<br>c.3724G>A       | 0.0000196  | 23.8       |
| <i>STARD9</i>   | Start domain containing protein 9                     | Missense      | chr15:g.43009197C>T         | ENST00000290607.7:<br>c.13445C>T | ENST00000290607.7:<br>c.13445C>T      | 0.000859   | 23.2       |
| <i>SORBS1</i>   | SORBIN and SH3 domains containing protein 1           | Missense      | chr10:g.97096822G>C         | ENST00000371247.2:<br>c.3095C>G  | ENST00000371247.2:<br>c.3095C>G       | 0.000834   | 23.1       |
| <i>OR6K3</i>    | Olfactory receptor family 6 subfamily K member 3      | Missense      | chr1:g.158687688T>A         | ENST00000368145.1:<br>c.218A>T   | ENST00000368145.1:<br>c.218A>T        | 0          | 22.5       |
| <i>ALG8</i>     | Alpha-1,3-glucosyltransferase                         | Missense      | chr11:g.77812075C>T         | ENST00000299626.5:<br>c.1516G>A  | ENST00000299626.5:<br>c.1516G>A       | 0.000427   | 20.9       |
| <i>WDR47</i>    | WD repeat domain 47                                   | Missense      | chr1:g.109538319T>C         | ENST00000400794.3:<br>c.1598A>G  | ENST00000400794.3:<br>c.1598A>G       | 0.0000487  | 20.4       |
| <i>SV2A</i>     | Synaptic vesicle glycoprotein 2A                      | Missense      | chr1:g.149878301T>G         | ENST00000369146.3:<br>c.1786A>C  | ENST00000369146.3:<br>c.1786A>C       | 0.0000651  | 19.0       |

Table S2. Filtered homozygous C1 variants identified in P1 and filtered homozygous variants in P2 (Continued)

| Gene           | Gene description                  | Coding effect     | Genomic annotation (GRCh37)     | cDNA annotation                    | Protein annotation                 | gnomAD AF  | CADD score |
|----------------|-----------------------------------|-------------------|---------------------------------|------------------------------------|------------------------------------|------------|------------|
| <i>ASTN2</i>   | Astrotactin 2                     | Missense          | chr9:g.120177057C>T             | ENST00000361209.2:<br>c.160G>A     | ENST00000361209.2:<br>c.160G>A     | 0          | 18.8       |
| <i>IFT81</i>   | Intraflagellar transport 81       | Missense          | chr12:g.110566928A>G            | ENST00000242591.5:<br>c.422A>G     | ENST00000242591.5:<br>c.422A>G     | 0.000359   | 18.3       |
| <i>SOX4</i>    | SRY-Box4                          | In-frame deletion | chr6:<br>g.21595443_21595445del | ENST00000244745.1:<br>c.678_680del | ENST00000244745.1:<br>c.678_680del | 0.00006620 | 16.7       |
| <i>EMILIN1</i> | Elastin microfibril interfacier 1 | Missense          | chr2:g.27306843G>A              | ENST00000380320.4:<br>c.2404G>A    | ENST00000380320.4:<br>c.2404G>A    | 0          | 15.9       |
| <i>IL6R</i>    | Interleukin 6 receptor alpha      | Missense          | chr1:g.154408476A>C             | ENST00000368485.3:<br>c.839A>C     | ENST00000368485.3:<br>c.839A>C     | 0          | 10.5       |

## References

- Shahin, T., D. Aschenbrenner, D. Cagdas, S.K. Bal, C.D. Conde, W. Garncarz, D. Medgyesi, T. Schwerd, B. Karaatmaca, P.G. Cetinkaya, et al. 2019. Selective loss of function variants in *IL6ST* cause Hyper-IgE syndrome with distinct impairments of T-cell phenotype and function. *Haematologica*. 104:609–621. <https://doi.org/10.3324/haematol.2018.194233>
- Xu, C., and Z. Su. 2015. Identification of cell types from single-cell transcriptomes using a novel clustering method. *Bioinformatics*. 31:1974–1980. <https://doi.org/10.1093/bioinformatics/btv088>
